# Supplementary material for: Development of a gene doping detection method to detect overexpressed human follistatin using an adenovirus vector in mice
Source: PeerJ journal article supplement (doi:10.7717/peerj.12285), 2021-10-20

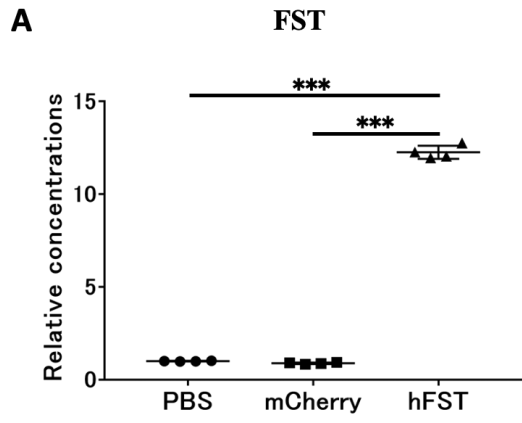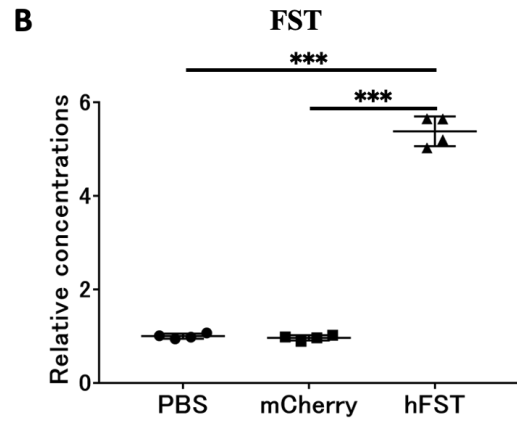

Supplement: Supplement_Figure_1.pdf [file Supplement_Figure_1.pdf]
