# Supplementary material for: Development of a gene doping detection method to detect overexpressed human follistatin using an adenovirus vector in mice
Source: PeerJ. 2021 Oct 20;9:e12285. doi: 10.7717/peerj.12285 (PMC8541302; doi:10.7717/peerj.12285)
Supplement: Supplemental Information 6 [file peerj-09-12285-s006.xlsx]

## Sheet: HuH7-qPCR&WB-
	HuH7 cell qPCR
	PBS	mCherry	hFST
	1.78651	0.200446	31792.1
	1.53052	0.393607	109925
	0.156004	1.767	87119.9
	0.526963	0.971631	64208.6
	HuH7 cell supernatant qPCR
	PBS	mCherry	hFST
	10.3245	2.03918	6.6011e+06
	6.32449	7.82876	8.72625e+06
	0	11.23	6.13249e+06
	1.69096	15.4824	8.04565e+06
	HuH7 WB
	PBS	mCherry	hFST
	1.58118	1.8146	16.0501
	0.933104	1.56345	16.2433
	0.64799	2.03516	14.77
	0.837728	1.80941	21.3366

## Sheet: C2C12 -qPCR&WB-
	C2C12 cell qPCR					C2C12 WB_Akt
	PBS	mCherry	hFST			PBS	mCherry	hFST
	1.52395	0.309039	117959			1.03397	0.926425	1.52979
	1.48955	0.24887	186236			0.966979	1.05611	1.93418
	0.170824	1.15903	150812			1.14249	0.955299	1.40164
	0.815671	0.87484	179403			0.856568	0.887587	0.985853
	C2C12 cell supernatantqPCR					C2C12 WB_p70S6K
	PBS	mCherry	hFST			PBS	mCherry	hFST
	7.91145	7.37209	2.00711e+07			0.654464	1.1134	2.26426
	6.62053	11.2509	2.54425e+07			0.91792	1.26172	2.38059
	5.10611	5	1.86559e+07			1.29559	1.00372	1.35646
	2.04973	4.10628	1.80419e+07			1.13203	1.06552	1.33411
	C2C12 WB_FST					C2C12 immunofluorscent
	PBS	mCherry	hFST			PBS	hFST
	0.950762	1.01899	12.202			0.667936	23.4487
	1.10599	0.861849	14.6477			0.909184	22.3163
	1.00495	0.758953	18.5406			1.42288	30.5343
	0.938299	1.31865	30.9226

## Sheet: Long term detection of intraven
	CMVp
	pre	3 h	6 h	12 h	1 day	2 day	3 day	4 day	5 day	6 day	7 day
	0	37982.2	13459.6	5784.14	2062.23	3982.33	467.341	1708.35	0	0	0
	0	26965	89273.9	21068.5	22076.8	705.308	1409.76	1846.28	903.742	170.556	279.813
	0	8202.05	21305.1	12203.6	10805.7	4283.41	1065.95	612.505	0	0	0
	0	782.205	1568.3	1988.86	752.553	1362.1	337.774	0	0	0	0
	0	1550.81	649.228	866.582	3388.76	2292.75	591.77	0	0	0	0
	0	16658.4	39275.7	8250.38	2601.87	3648.54	3670.08	888.922	0	0	0
	0	377.018	1307.88	2912.95	1125.16	561.356	947.015	0	0	0	0
	0	887.327	161.738	888.385	1163.06	665.786	0	0	0	0	0
	0	1286.51	2870.22	18020.8	3282.4	1553.61	1693.72	749.178	0	0	0
	0	2819.1	862.506	945.717	4180.43	4466.65	567.963	271.438	0	0	0
	hFST
	pre	3 h	6 h	12 h	1 day	2 day	3 day	4 day	5 day	6 day	7 day
	0	38907.8	19749.8	12212.5	6026.33	24247.2	0	1439.64	0	0	0
	0	38506.8	184782	59499.7	43871.5	0	6236.78	1301.13	1508.39	0	0
	0	15153.5	11951.3	44825.8	22853.5	13124.4	0	0	0	0	0
	0	1377.45	2687.64	5510.71	2318.83	8246.11	0	0	0	0	0
	0	1354.88	925.916	2914.3	7460.11	4608.7	0	0	0	0	0
	0	11668.4	29703.4	25570	18497.6	8979.81	5307.94	906.386	0	0	0
	0	0	2901.36	8982.9	8494.14	0	0	0	0	0	0
	0	0	1104.45	6175.54	2620.26	0	0	0	0	0	0
	0	2525.83	4377.88	30669.9	14365.1	7057.01	5286.56	0	0	0	0
	0	4609.86	2520.07	0	14575.1	7525.36	0	0	0	0	0

## Sheet: Long term detection of intramus
	CMVp-10
	pre	3 h	6 h	12 h	1 day	1.5 day	2 day	2.5 day	3 day	3.5 day	4 day	5 day
	0	131.394	122.389	186.243	76.0258	246.762	0	0	0	0	0	0
	0	685.257	97.1082	146.277	27.5679	193.376	76.2229	362.812	107.326	57.5903	0	0
	0	630.935	104.164	174.027	95.1455	0	0	0	0	0	0	0
	0	322.158	132.35	233.625	103.866	0	0	95.426	0	0	0	0
	0	1098.62	252.472	156.454	73.6528	0	71.7658	0	110.314	0	0	0
	0	881.111	222.472	495.471	138.557	190.201	48.9466	166.842	131.54	71.9879	0	0
	CMVp-100
	pre	3 h	6 h	12 h	1 day	1.5 day	2 day	2.5 day	3 day	3.5 day	4 day	5 day
	0	1744.97	1309.87	1126.64	784.242	501.242	363.594	776.58	220.571	0	0	0
	0	5791.1	924.997	1128.84	1096.43	1126.39	737.143	1702.04	822.193	352.74	215.964	136.777
	0	6066.72	1413.35	934.272	354.332	228.248	271.305	129.815	117.06	0	0	0
	0	2853.79	1163.22	1515.51	404.971	299.688	151.704	403.514	639.791	295.15	0	0
	0	7450.83	3921.49	1113.38	322.65	509.233	345.859	514.635	736.905	309.548	129.578	0
	0	8465.61	2372.18	3934.44	1058.28	1328.95	560.057	1855.32	883.959	338.343	107.982	79.1867
	hFST-10
	pre	3 h	6 h	12 h	1 day	1.5 day	2 day	2.5 day	3 day	3.5 day	4 day	5 day
	0	200.937	181.944	91.4633	52.8589	89.799	0	0	0	0	0	0
	0	739.705	90.2085	173.983	0	0	129.502	0	0	0	0	0
	0	742.521	190.795	227.777	0	0	0	0	0	0	0	0
	0	360.372	233.792	265.015	40.6828	0	0	0	0	0	0	0
	0	492.306	319.402	180.187	0	0	0	0	0	0	0	0
	0	913.117	405.273	346.111	182.76	86.5662	134.69	0	0	0	0	0
	hFST-100
	pre	3 h	6 h	12 h	1 day	1.5 day	2 day	2.5 day	3 day	3.5 day	4 day	5 day
	0	2047.71	1696.74	1249.02	574.68	693.234	740.29	304.514	0	0	0	0
	0	6859.55	1390.45	1580.93	990.683	1338.6	695.91	2043.94	264.536	425.358	0	0
	0	8550.97	2418.86	1853.62	301.927	106.914	64.7891	0	0	0	0	0
	0	3696.47	2165.78	2457.58	728.563	392.538	259.156	423.344	0	0	0	0
	0	10397.4	3165.03	1496.01	385.056	399.265	337.588	530.036	0	0	0	0
	0	9424.72	3158.34	4409.16	1369.49	1166.2	740.819	1545.02	234.181	335.979	0	0

## Sheet: Transgene lacalization -qPCR-
	CMVp						hFST
	PBS Blood-cell	hFST Blood-cell	PBS Plasma	hFST Plasma			PBS Blood-cell	hFST Blood-cell	PBS Plasma	hFST Plasma
	0	126765	0	638472			0	102164	0	581110
	0	34017.8	0	142023			0	23612.3	0	146866
	0	37791.6	0	360489			0	27310.1	0	344035
	0	24055.1	0	79557.8			0	15232.4	0	78303.8
	0	6230.03	0	52545.9			0	3876.65	0	50535.8
	0	10040.1	0	58775.7			0	10037.9	0	55989.1
		106024		680227				91031		638785
		10802.8		75066.8				8548.4		71432.2
